# Supplementary material for: Galectin-1 is associated with the severity of coronary artery disease and adverse cardiovascular events in patients undergoing coronary angiography
Source: PubMed Central journal article supplement (PMC7692553; doi:10.1038/s41598-020-77804-6), 2020-11-26
Supplement: 41598_2020_77804_MOESM1_ESM.pdf [file 41598_2020_77804_MOESM1_ESM.pdf]

**SUPPLEMENT**

**Galectin-1 is Associated with the Severity of Coronary Artery Disease and Adverse Cardiovascular Events in Patients Undergoing Coronary Angiography**

**Ruey-Hsing Chou<sup>1,2,3,4</sup>, Shao-Sung Huang<sup>1,4,5,\*</sup>, Chin-Sung Kuo<sup>4,6</sup>, Shen-Chih Wang<sup>7,8</sup>, Yi-Lin Tsai<sup>1,3</sup>, Ya-Wen Lu<sup>1,3</sup>, Chun-Chin Chang<sup>1,3,4</sup>, Po-Hsun Huang<sup>1,2,3,4,\*</sup>, Shing-Jong Lin<sup>1,3,4</sup>**

<sup>1</sup> Division of Cardiology, Department of Medicine, Taipei Veterans General Hospital, Taipei, Taiwan

<sup>2</sup> Department of Critical Care Medicine, Taipei Veterans General Hospital, Taipei, Taiwan

<sup>3</sup> Cardiovascular Research Center, National Yang-Ming University, Taipei, Taiwan

<sup>4</sup> Institute of Clinical Medicine, National Yang-Ming University, Taipei, Taiwan

<sup>5</sup> Healthcare and Management Center, Taipei Veterans General Hospital, Taipei, Taiwan

<sup>6</sup> Division of Endocrinology and Metabolism, Department of Medicine, Taipei Veterans General Hospital, Taipei, Taiwan

<sup>7</sup> Department of Anesthesiology, Taipei Veterans General Hospital, Taipei, Taiwan

<sup>8</sup> School of Medicine, National Yang Ming University, Taipei, Taiwan

**Supplement table 1.** Correlation coefficients of circulating galectin-1, hsCRP concentration, anatomical SYNTAX score (SYNTAX Sc), and various clinical variables

| Variables                            | Galectin-1 |         | hsCRP  |         | SYNTAX Sc |         |
|--------------------------------------|------------|---------|--------|---------|-----------|---------|
|                                      | R          | P value | R      | P value | R         | P value |
| Age (years)                          | 0.252      | <0.001  | 0.130  | <0.001  | 0.266     | <0.001  |
| Body mass index (kg/m <sup>2</sup> ) | 0.056      | 0.018   | 0.102  | 0.004   | -0.016    | 0.688   |
| White blood cells (K/cumm)           | 0.112      | <0.001  | 0.190  | <0.001  | 0.109     | 0.006   |
| Hemoglobin (g/dL)                    | -0.229     | <0.001  | -0.181 | <0.001  | -0.185    | <0.001  |
| Fasting glucose (mg/dL)              | 0.077      | 0.032   | 0.077  | 0.036   | 0.208     | <0.001  |
| Creatinine (mg/dL)                   | 0.496      | <0.001  | 0.198  | <0.001  | 0.270     | <0.001  |
| Total cholesterol (mg/dL)            | -0.071     | 0.042   | -0.042 | 0.242   | -0.145    | <0.001  |
| Triglycerides (mg/dL)                | 0.144      | <0.001  | 0.089  | 0.013   | 0.058     | 0.155   |
| Hs-CRP (mg/dL)                       | 0.293      | <0.001  | --     | --      | 0.234     | <0.001  |
| SYNTAX Sc                            | 0.275      | <0.001  | 0.234  | <0.001  | --        | --      |
| LV ejection fraction (%)             | -0.160     | 0.004   | -0.158 | 0.005   | -0.250    | <0.001  |

Hs-CRP, high sensitive C-reactive protein; LV ejection fraction, left ventricular ejection fraction.
